# Supplementary material for: Contemporary human H3N2 influenza A viruses require a low threshold of suitable glycan receptors for efficient infection
Source: PubMed Central journal article supplement — Glycobiology. 2023 Jul 20;33(10):784–800. doi: 10.1093/glycob/cwad060 (PMC10629718; doi:10.1093/glycob/cwad060), 2023-07-20
Supplement: spruit_et_al_glycobiology_supplementary_data_v4_cwad060.pdf [file spruit_et_al_glycobiology_supplementary_data_v4_cwad060.pdf]

**Supplementary data to:**

**Contemporary human H3N2 influenza A viruses require a low threshold of suitable glycan receptors for efficient infection**

Running head: Recent H3N2 influenza requires a low threshold of receptors

Cindy M. Spruit<sup>1</sup>, Igor R. Sweet<sup>1</sup>, Joshua C. L. Maliepaard<sup>2</sup>, Theo Bestebroer<sup>3</sup>, Pascal Lexmond<sup>3</sup>, Boning Qiu<sup>4</sup>, Mirjam J.A. Damen<sup>2</sup>, Ron A. M. Fouchier<sup>3</sup>, Karli R. Reiding<sup>2</sup>, Joost Snijder<sup>2</sup>, Sander Herfst<sup>3</sup>, Geert-Jan Boons<sup>1,5</sup>, Robert P. de Vries<sup>1\*</sup>

<sup>1</sup> Department of Chemical Biology & Drug Discovery, Utrecht Institute for Pharmaceutical Sciences, Utrecht University, Universiteitsweg 99, 3584CG, Utrecht, The Netherlands

<sup>2</sup> Biomolecular Mass Spectrometry and Proteomics, Bijvoet Center for Biomolecular Research and Utrecht Institute of Pharmaceutical Sciences, Utrecht University, Padualaan 8, 3584CH, Utrecht, The Netherlands

<sup>3</sup> Department of Viroscience, Erasmus University Medical Center, Dr. Molewaterplein 50, 3015GE Rotterdam, The Netherlands

<sup>4</sup> Department of Pharmaceutics, Utrecht Institute for Pharmaceutical Sciences, Utrecht University, Universiteitsweg 99, 3584 CG Utrecht, The Netherlands

<sup>5</sup> Complex Carbohydrate Research Center, University of Georgia, 315 Riverbend Rd, Athens, GA 30602, USA

\* for correspondence: [r.vries@uu.nl](mailto:r.vries@uu.nl)

Key words: genetic glycoengineering / H3N2 / influenza / poly-LacNAc / sialic acid

Supplementary data includes: Figs. S1-S8 and Tables SI-SXIII

## Supplementary figures

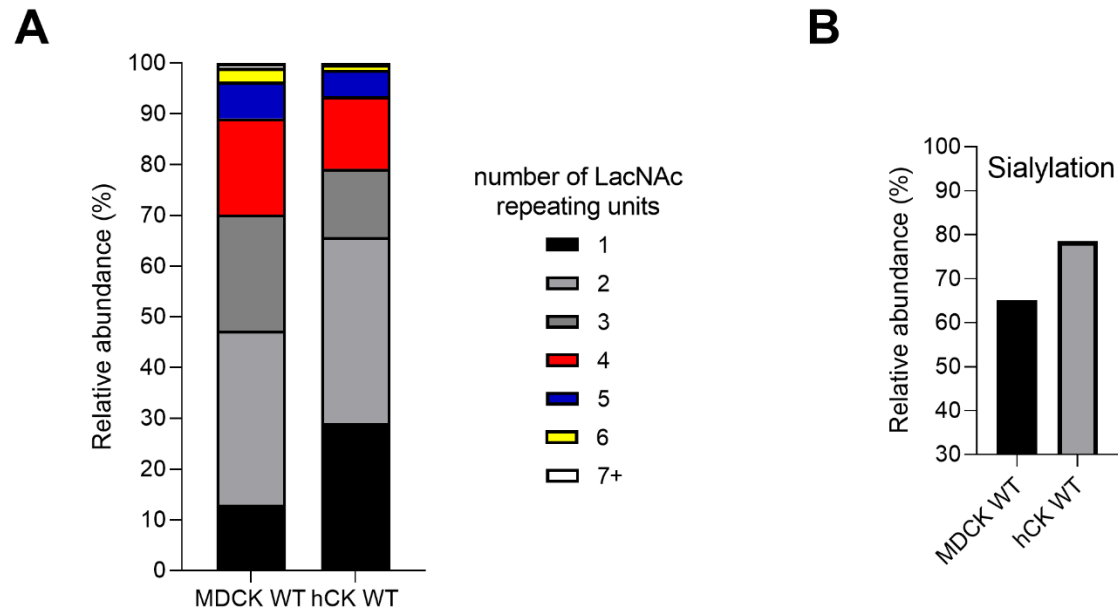

**Fig S1. Meta-analysis of the MALDI-TOF-MS analysis of assigned peaks of *N*-glycans of (Byrd-Leotis, L., Jia, N., et al. 2022)**

**(A)** The data in Supplementary Table 1 of (Byrd-Leotis, L., Jia, N., et al. 2022) was analyzed to investigate the number of LacNAc repeating units of the detected *N*-glycans. Analysis was done similar to the analysis presented in Fig. 3B. **(B)** The data from (Byrd-Leotis, L., Jia, N., et al. 2022) was further analyzed to investigate the relative abundance of glycans (30-100%) with at least one Sia. The percentages were calculated as a percentage of the total abundance of glycans with at least one LacNAc repeating unit (the glycans shown in Fig. S1A).

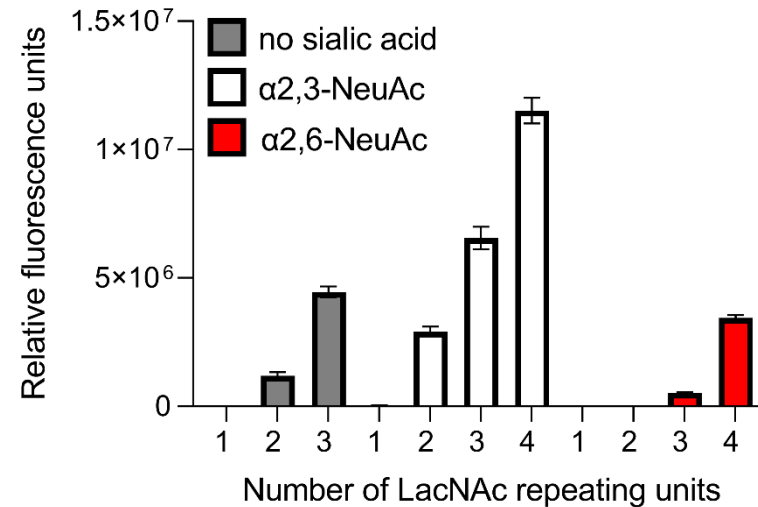

**Fig S2. Binding specificity of *Lycopersicon esculentum* lectin on the glycan microarray**

The binding of the *Lycopersicon esculentum* lectin (LEL) to symmetric bi-antennary *N*-glycans with 1, 2, 3, or 4 consecutive LacNAc repeating units terminating in no sialic acid, α2,3-linked NeuAc, or α2,6-linked NeuAc was investigated. Six replicates were performed simultaneously, after which the highest and lowest replicates were removed, and the mean and standard deviation were calculated over the four remaining replicates. The glycan array was performed as described earlier (Broszeit, F., Tzarum, N., et al. 2019).

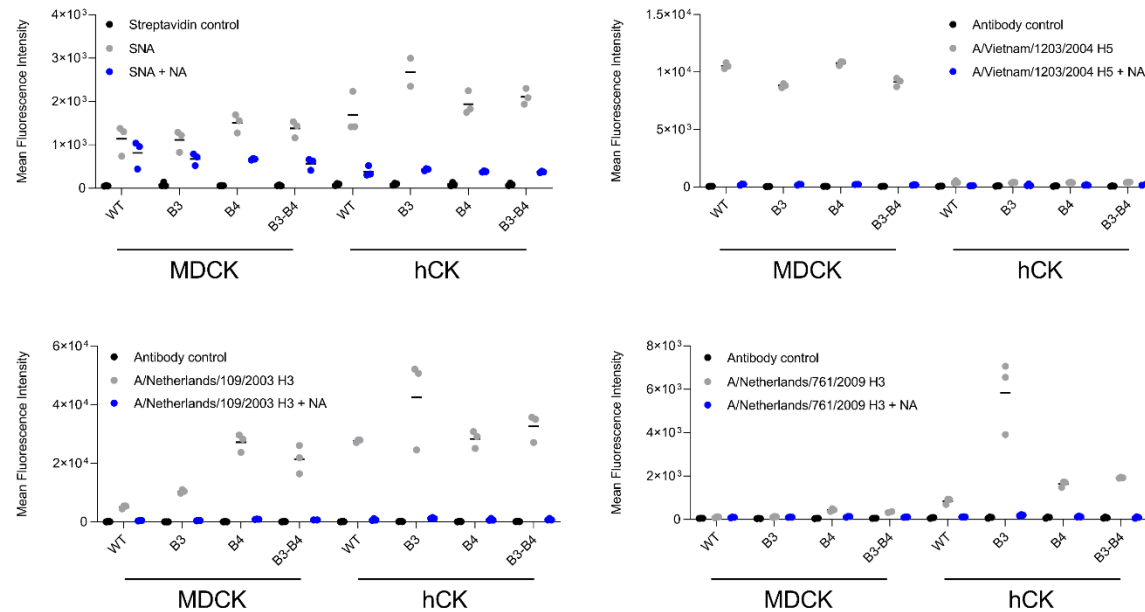

**Fig S3. Flow cytometry with neuraminidase-treated B3GNT2/B4GALT1 knock-in MDCK and hCK cells**

Binding of the lectin SNA and HAs A/Vietnam/1203/2004 H5, A/Netherlands/109/2003 H3, and A/Netherlands/761/2009 H3 with and without neuraminidase (NA) were measured using flow cytometry. The gating strategy as indicated in Fig. 2A was used. Triplicate measurements were performed, and the mean and all individual measurements are shown.

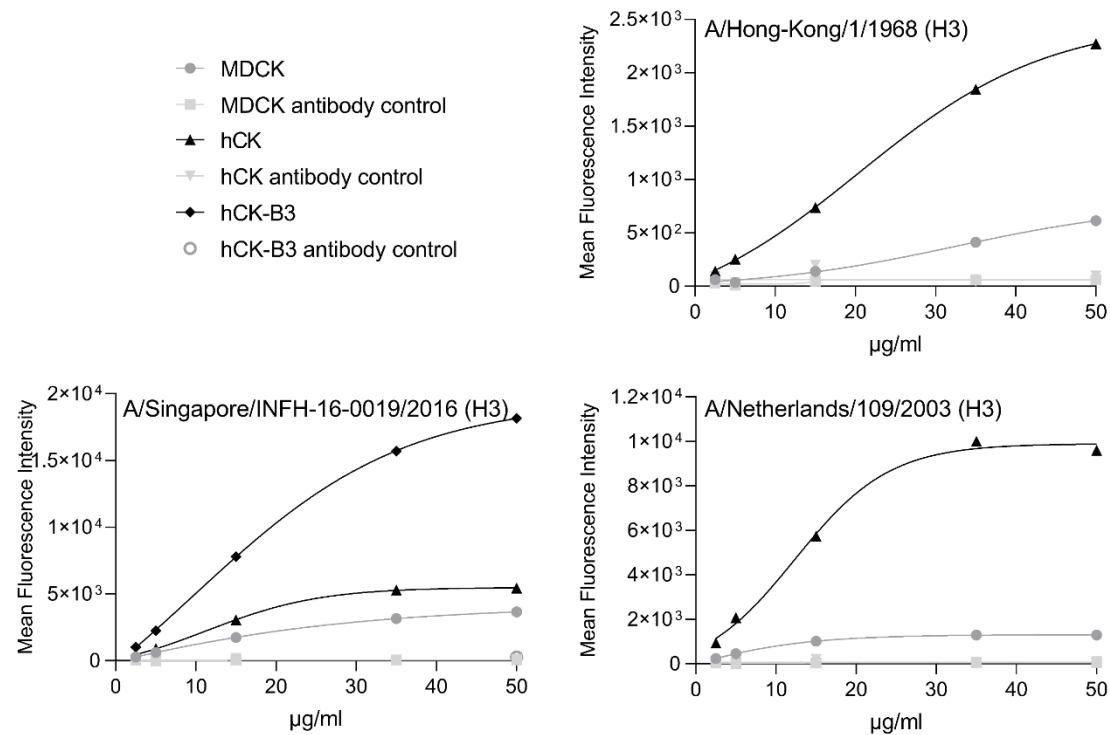

**Fig S4. Titration of influenza hemagglutinins in flow cytometry**

Flow cytometric titrations of the H3 HAs of A/Hong-Kong/1/1968, A/Singapore/INFH-16-0019/2016, and A/Netherlands/109/2003 in MDCK and hCK cells, including controls in the presence of just precomplexing controls were performed. For A/Singapore/INFH-16-0019/2016, also hCK-B3GNT2 cells were used. The gating strategy as described in Fig. 2A was used.

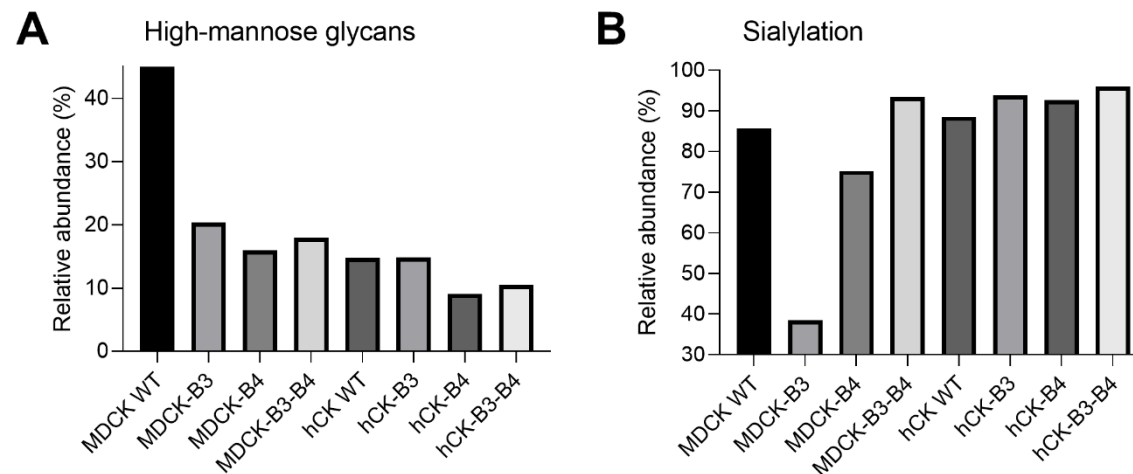

**Fig S5. Relative abundance of high-mannose glycans and sialylation on WT and B3GNT2/B4GALT1 knock-in MDCK and hCK cells**

The *N*-glycans from WT and B3GNT2/B4GALT1 knock-in MDCK and hCK cells were measured using HILIC-IMS-QTOF positive mode mass spectrometry. **(A)** The relative abundance of high-mannose glycans was calculated as a percentage of all detected *N*-glycans (see Table SII-IX). **(B)** The relative abundance of glycans (30-100%) with at least one Sia was calculated as a percentage of the total abundance of glycans with at least one LacNAc repeating unit (the glycans shown in Fig. 3B).

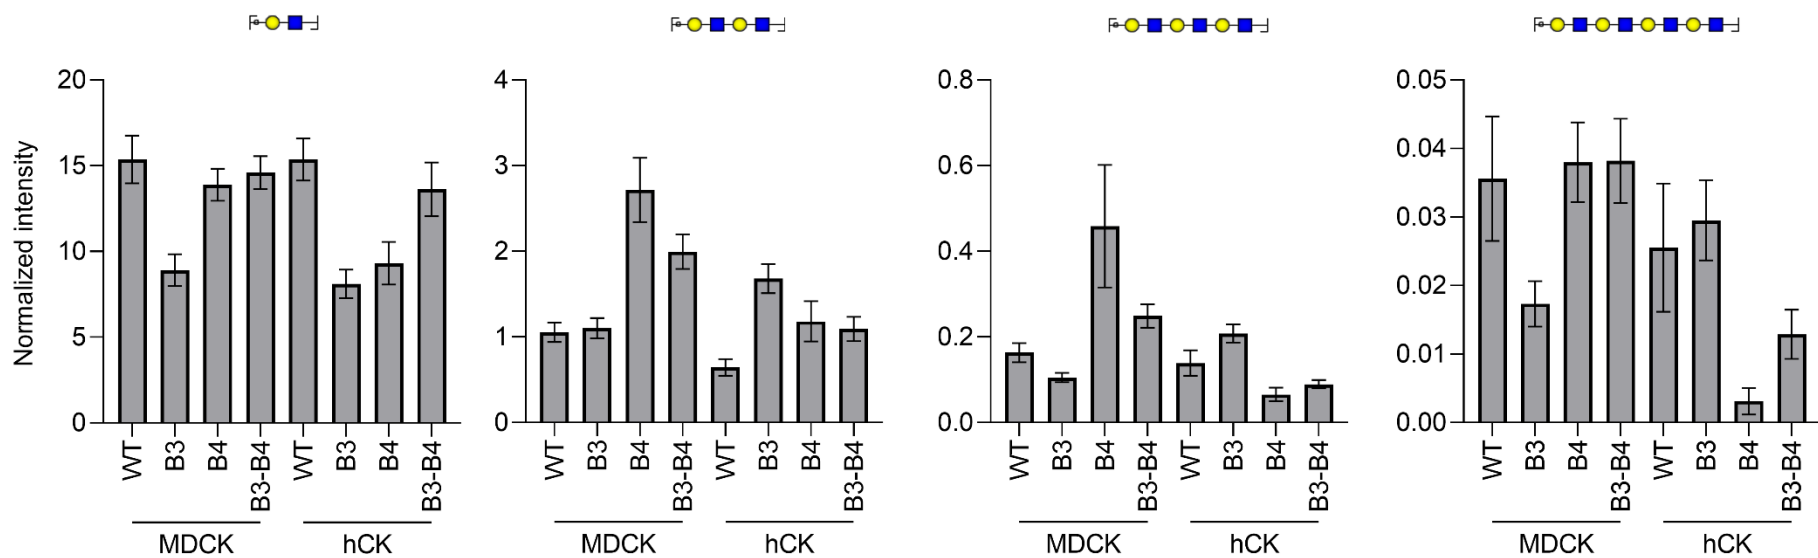

**Fig S6. Normalized intensity of (repeating) LacNAc oxonium ions in MS/MS analysis**

The *N*-glycans from WT and B3GNT2/B4GALT1 knock-in MDCK and hCK cells were analyzed by MS/MS. Analysis of the *N*-glycans was additionally performed by LC-MS/MS, followed by analysis of the glycan oxonium ions (Table SX). (Repeating) LacNAc oxonium ions with masses (from left to right) 366.1395, 731.2717, 1096.4039, and 1461.5361 were identified and the amounts detected were normalized to the core fragments. Mean and standard errors (n=3) are shown.



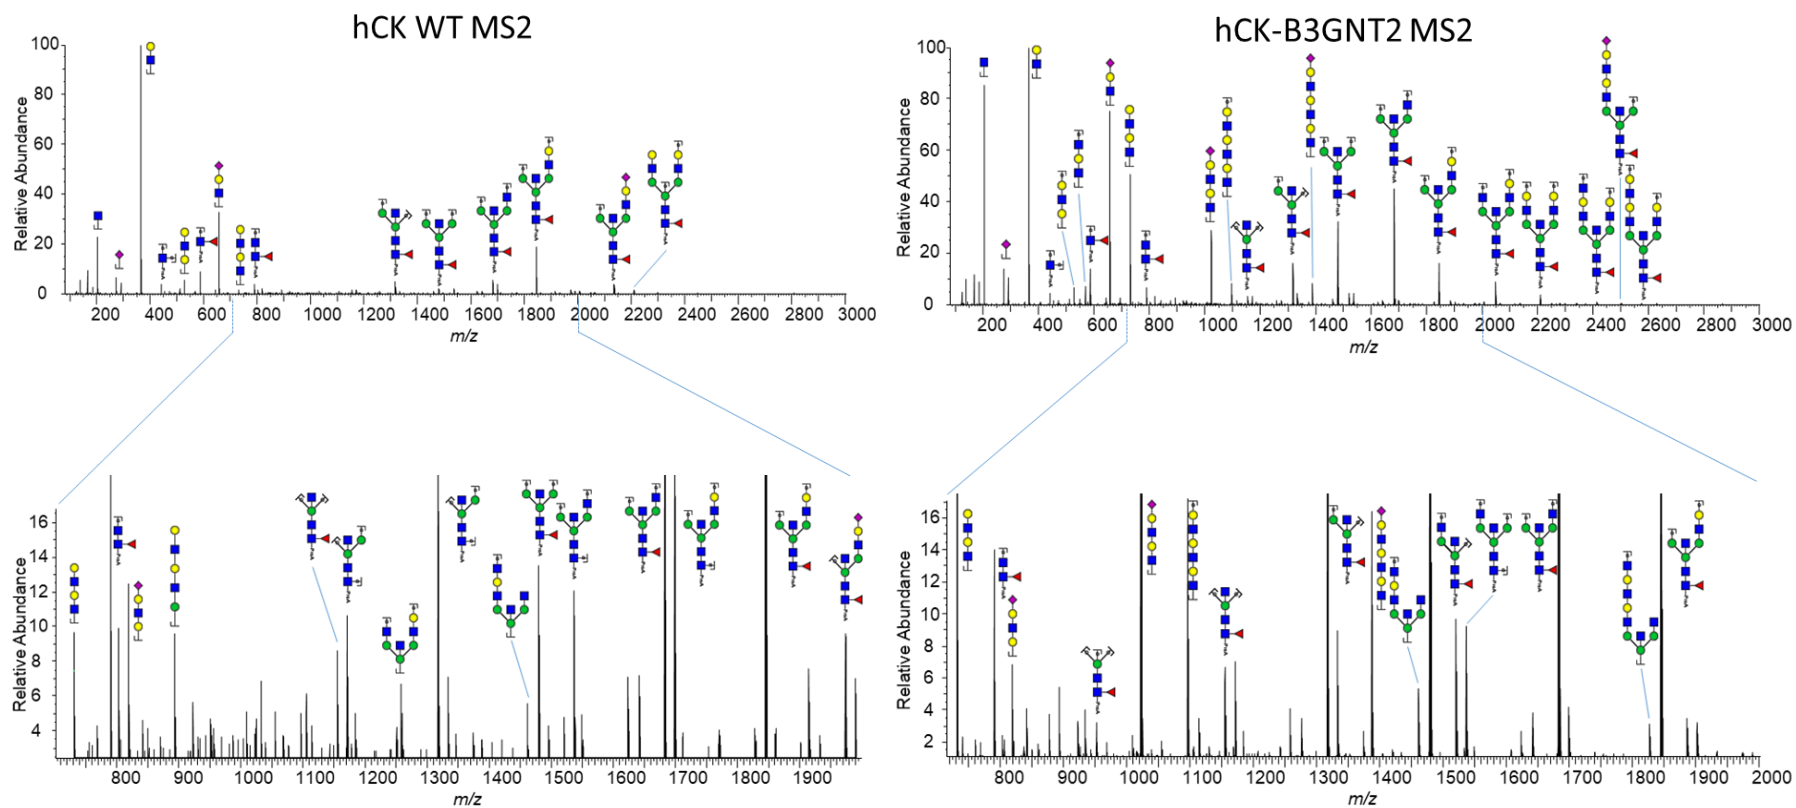

**Fig S7. Annotated MS/MS spectra of selected *N*-glycans of hCK WT and hCK-B3GNT2 cells**

Higher-energy collisional dissociation fragmentation at 15% NCE showed the presence of multiple oxonium ions that indicate repeating LacNAc units as well as bisection. The glycan cartoons are mostly compositional, since our LC-MS/MS method lacks the ability to give structure specific information.

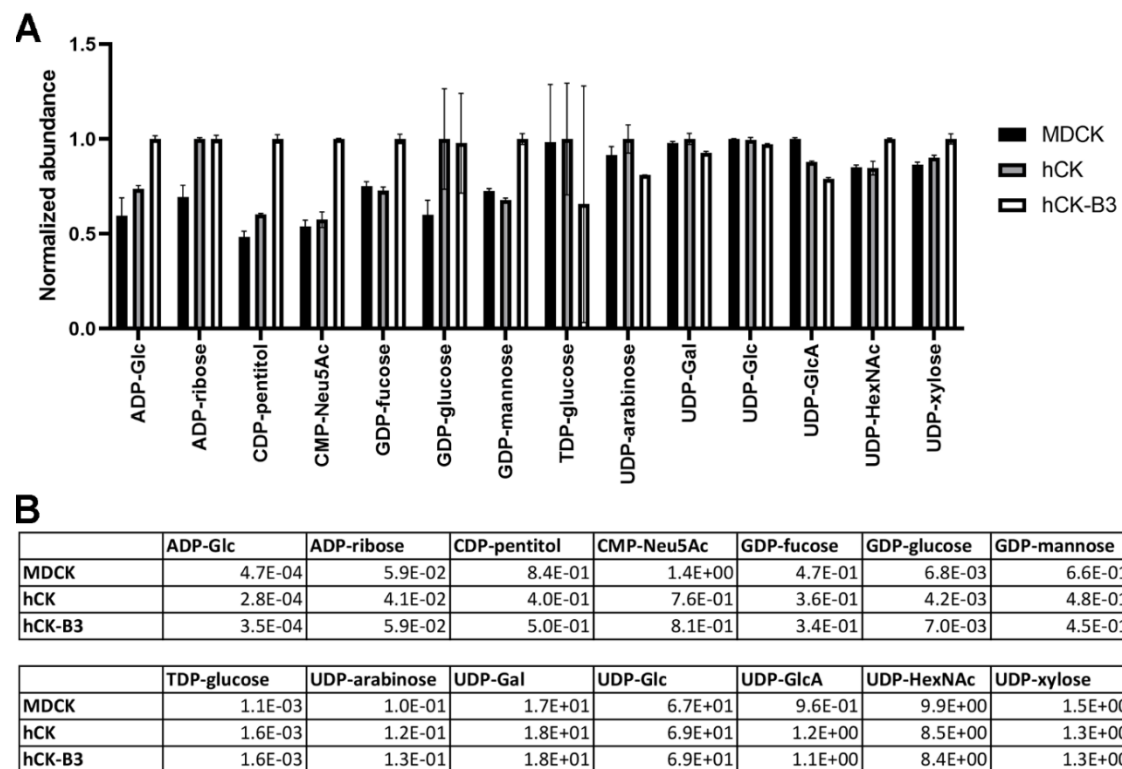

**Fig S8. Sugar nucleotide analysis of MDCK, hCK, and hCK-B3GNT2 cells**

The sugar nucleotides in the lysate of MDCK, hCK, and hCK-B3GNT2 cells were analyzed by mass spectrometry (n=2). **(A)** The normalized abundance of all measured sugar nucleotides is shown. Normalization was performed on the cell line with the highest amount of each sugar nucleotide. **(B)** Details of all analyzed sugar nucleotides, normalized over the sum of all measured nucleotide sugars.

## Supplementary tables

**Table SI. Specificities of used lectins and viral proteins**

| Lectin/viral protein                                 | Receptor specificity                                                                                                                                                                  | Reference                                                                                                                |
|------------------------------------------------------|---------------------------------------------------------------------------------------------------------------------------------------------------------------------------------------|--------------------------------------------------------------------------------------------------------------------------|
| <i>Sambucus nigra</i> agglutinin (SNA)               | $\alpha$ 2,6-linked Sias                                                                                                                                                              | (Shibuya, N., Goldstein, I.J., et al. 1987)                                                                              |
| <i>Lycopersicon esculentum</i> lectin (LEL)          | Elongated glycans, prefers $\alpha$ 2,3-linked Sias over $\alpha$ 2,6-linked Sias                                                                                                     | (Sweeney, J.G., Liang, J., et al. 2018), this work                                                                       |
| <i>Erythrina cristagalli</i> lectin (ECA)            | Terminal galactose, thus glycans lacking Sia capping                                                                                                                                  | (Broszeit, F., Tzarum, N., et al. 2019)                                                                                  |
| $\gamma$ CoV/AvCoV/guinea fowl/France/14032/2014 NTD | Elongated glycans                                                                                                                                                                     | (Bouwman, K.M., Delpont, M., et al. 2019)                                                                                |
| A/Vietnam/1203/2004 H5                               | Terminal $\alpha$ 2,3-linked Sias                                                                                                                                                     | (Broszeit, F., Tzarum, N., et al. 2019, Spruit, C.M., Nemanichvili, N., et al. 2021, Spruit, C.M., Zhu, X., et al. 2022) |
| A/Puerto-Rico/8/1934 H1                              | Terminal $\alpha$ 2,6-linked Sias                                                                                                                                                     | (Nemanichvili, N., Tomris, I., et al. 2019)                                                                              |
| A/Hong-Kong/1/1968 H3                                | Terminal $\alpha$ 2,6-linked Sias, does not require multiple consecutive LacNAc, but strong preference for glycans with three or four consecutive LacNAc repeating units.             | (Peng, W., de Vries, R.P., et al. 2017)                                                                                  |
| A/Netherlands/109/2003 H3                            | Terminal $\alpha$ 2,6-linked Sias, binds glycans with both two and three, but not one, consecutive LacNAc repeating units.                                                            | (Broszeit, F., van Beek, R.J., et al. 2021)                                                                              |
| A/Netherlands/761/2009 H3                            |                                                                                                                                                                                       |                                                                                                                          |
| A/Hong-Kong/480/2014 H3 (3C.2a)                      | Exact specificity unknown. In general, contemporary H3 IAVs are known to bind terminal $\alpha$ 2,6-linked Sias presented on glycans with multiple consecutive LacNAc repeating units | See references in introduction                                                                                           |
| A/Netherlands/354/2016 H3                            |                                                                                                                                                                                       |                                                                                                                          |
| A/Singapore/INFH-16-0019/2016 H3 (3C.2a)             |                                                                                                                                                                                       |                                                                                                                          |
| A/Kansas/14/2017 H3 (3C.3a)                          |                                                                                                                                                                                       |                                                                                                                          |
| A/Netherlands/00010/2019 H3 (3C.2a)                  |                                                                                                                                                                                       |                                                                                                                          |

## Supplementary tables presented in the attached excel file

**Table SII.** Relative abundance of *N*-glycans of MDCK WT cells measured using HILIC-IMS-QTOF positive mode mass spectrometry

**Table SIII.** Relative abundance of *N*-glycans of MDCK-B3GNT2 cells measured using HILIC-IMS-QTOF positive mode mass spectrometry

**Table SIV.** Relative abundance of *N*-glycans of MDCK-B4GALT1 cells measured using HILIC-IMS-QTOF positive mode mass spectrometry

**Table SV.** Relative abundance of *N*-glycans of MDCK-B3GNT2-B4GALT1 cells measured using HILIC-IMS-QTOF positive mode mass spectrometry

**Table SVI.** Relative abundance of *N*-glycans of hCK WT cells measured using HILIC-IMS-QTOF positive mode mass spectrometry

**Table SVII.** Relative abundance of *N*-glycans of hCK-B3GNT2 cells measured using HILIC-IMS-QTOF positive mode mass spectrometry

**Table SVIII.** Relative abundance of *N*-glycans of hCK-B4GALT1 cells measured using HILIC-IMS-QTOF positive mode mass spectrometry

**Table SIX.** Relative abundance of *N*-glycans of hCK-B3GNT2-B4GALT1 cells measured using HILIC-IMS-QTOF positive mode mass spectrometry

**Table SX.** List of oxonium ions of  $m/z$  120-2000  $[M+H]^+$  that were investigated in the MS/MS analysis

## Supplementary tables

**Table SXI. Primers used for the generation of the transfer plasmids.** In brackets is indicated which segment is amplified, and the other part of the name indicates the overhang. The overhang is marked in bold in the sequence.

| Primer            | Sequence                                                  | Used in plasmid                                 |
|-------------------|-----------------------------------------------------------|-------------------------------------------------|
| B4GALT1-(pCF)-fwd | <b>GGACACCGAGCT</b> ACGCGTTAAGTCGACAATC                   | pCF-B3GNT2-B4GALT1<br>pCF-B4GALT1               |
| ss-(pCF)-rev      | <b>CCGAAGCCTCAT</b> CGGTCCAGGATTCTCTTC                    | pCF-B3GNT2-B4GALT1<br>pCF-B3GNT2<br>pCF-B4GALT1 |
| pCF-(ss)-fwd      | <b>GAATCCTGGACCG</b> ATGAGGCTTCGGGAGCCG                   | pCF-B3GNT2-B4GALT1<br>pCF-B3GNT2<br>pCF-B4GALT1 |
| B3GNT2-(ss)-rev   | <b>CTTTCCATTTTT</b> CTGCAGCGGTGTGGAGAC                    | pCF-B3GNT2-B4GALT1<br>pCF-B3GNT2                |
| ss-(B3GNT2)-fwd   | <b>ACACCGCTGCAG</b> AAAAATGGAAAAGGGGAAG                   | pCF-B3GNT2-B4GALT1<br>pCF-B3GNT2                |
| T2A-(B3GNT2)-rev  | <b>CCCCTGCCCTCTCTAGAGGG</b> GCATTTTAAATGAGCACTCTGCAAC     | pCF-B3GNT2-B4GALT1                              |
| B3GNT2-(T2A)-fwd  | <b>GTTGCAGAGTGCTCATTTAAATG</b> CCCCTCTAGAGAGGGCAGGGGAAG   | pCF-B3GNT2-B4GALT1                              |
| ss-(T2A)-rev      | <b>CTCAGGAGCGGCTCCCGAAGCCTCAT</b> CTCGAGTGGGCCGGGATTTTCC  | pCF-B3GNT2-B4GALT1                              |
| T2A-(ss)-fwd      | <b>GGAAAATCCCGGCCCACTCGAGATGAGG</b> CTTCGGGAGCCGCTCCTGAG  | pCF-B3GNT2-B4GALT1                              |
| B4GALT1-(ss)-rev  | <b>CACTGTTTCGAGCC</b> CTGCAGCGGTGTGGAGAC                  | pCF-B3GNT2-B4GALT1<br>pCF-B4GALT1               |
| ss-(B4GALT1)-fwd  | <b>GGTCGGAGTCTCCACACCGCTGCAG</b> GGCTCGAACAGTGCCGCCGCCATC | pCF-B3GNT2-B4GALT1<br>pCF-B4GALT1               |
| pCF-(B4GALT1)-rev | <b>GAGGTTGATTGTCGACTTAACGCGT</b> AGCTCGGTGTCCCGATGTCCACTG | pCF-B3GNT2-B4GALT1<br>pCF-B4GALT1               |
| B3GNT2-(pCF)-fwd  | <b>TTTAAAATGCACG</b> CGTTAAGTCGACAATC                     | pCF-B3GNT2                                      |
| pCF-(B3GNT2)-rev  | <b>CTTAACGCGT</b> GCATTTTAAATGAGCACTC                     | pCF-B3GNT2                                      |

**Table SXII. Primers used in the RT-qPCR experiments**

| <b>Primer</b> | <b>Sequence</b>              |
|---------------|------------------------------|
| B4GALT1-fw    | GACGTGGACCTCATTCCAA          |
| B4GALT1-rev   | CCCAATAATTATTAGGAAATCCATTGAT |
| B3GNT2-fw     | GACGTTTATACTGGAATGTGCC       |
| B3GNT2-rev    | CATCTCTTGAGGTTTTCTACTATG     |
| ST6GAL1-fw    | GATCATGACGCAGTCCTGAG         |
| ST6GAL1-rev   | GGTCCCATAACAATTAGGATTCC      |
| GAPDH-fw      | GTCGGAGTGAACGGATTTG          |
| GAPDH-rev     | GGAATTTGCCGTGGGTAG           |

**Table SXIII. Codon optimized nucleotide sequences of viral proteins.** The (codon optimized) sequences (synthesized by Genscript) were cloned into addgene plasmid #182546 using the underlined NheI and PaeI restriction sites.

| Viral protein                                                         | Nucleotide sequence                                                                                                                                                                                                                                                                                                                                                                                                                                                                                                                                                                                                                                                                                                                                                                                                                                                                                                                                                                                                                                                                                                                                                                                                                                                                                                                                                                                                                                                                                                                                                                            |
|-----------------------------------------------------------------------|------------------------------------------------------------------------------------------------------------------------------------------------------------------------------------------------------------------------------------------------------------------------------------------------------------------------------------------------------------------------------------------------------------------------------------------------------------------------------------------------------------------------------------------------------------------------------------------------------------------------------------------------------------------------------------------------------------------------------------------------------------------------------------------------------------------------------------------------------------------------------------------------------------------------------------------------------------------------------------------------------------------------------------------------------------------------------------------------------------------------------------------------------------------------------------------------------------------------------------------------------------------------------------------------------------------------------------------------------------------------------------------------------------------------------------------------------------------------------------------------------------------------------------------------------------------------------------------------|
| <p>γCoV/AvCoV/guinea fowl/France/14032/2014 NTD (codon optimized)</p> | <p><u>GCTAGCAGTCCCCTCCATCTGTAACAATGTC</u>ACTGTCGGAAAGCGGGTCATGTATCTCATGCCTGTCAATCCCAGCCTATGCCAACGGCCAGAACGGCGGGAGGCCCTGGACTTCTACTCCCAGATGTGATGCGGCCCCAGGACGGAGCCTATATCCAGTCTGGCTACTATGAGCCAGTGTTCACAGGCTGCTTTAACCAGACCAATCAGACAGATCCCACCTGTAGGAACGGCC TGTACAAGGGCACCCTGGCAATCTGTCTATCCCAGGCGGCTTCTGAACAAGTACGAGGCCCTTCGGCATCATGTTTTATTGGGGCCTGGACACAGTGTGACCAGCGGACGGGACC CCACCTTCAACCTGACCCTGGGCAATTTCTTTGTGAACCTAAGAATTTACAGGCTTTCAAAGGTGAAGAGCGTGATCTTCATCAACACCGGCGACATCTTTGTGAATGGCGCCTG CTGGGCAAGTACAACCTGAATTTCAAAACAACCTGGTCATCTGGCTGGCCAGTGCCTGGGACCATGAAGGTGGTGGTGTGAAGCAGTCTAATGCCCTGGTGCAGTTCAAGCGCC GGCAACGTGGTGGCCTTTGAGCCATGCACAGGCGATACCATCTGAATAAGCTGCACTGTTCTACCAGCAGTTCAACTTTTCTACAGGCTTCTATGACATCGATACTTTGTGCCGT GAGCTCCAATCTGACATACCTGCCCTATCCTGACCTGAAGGATAACACCGGCCAGCAGGTGTACGACTTTTATGTGGCCCTGAGGGGAGCAGAGGTGCACTACAAC<u>TTAATTAA</u></p>                                                                                                                                                                                                                                                                                                                                                                                                                                                                                                                                                                                                                                                                                                                             |
| <p>A/Vietnam/1203/2004 H5 (not codon optimized)</p>                   | <p><u>GCTAGCAGATCAGATTTGCATTGGTTACC</u>ATGCAAACTCGACAGAGCAGGTTGACACAATAATGAAAAGAAGCTTACTGTTACACATGCCAAAGACATACTGAAAAGACACA CAATGGGAAGCTCTGCGATCTAGATGGAGTGAAGCCTCAATTTTGGAGATTGTAGTGTAGCTGGATGGCTCCTCGGAAACCAATGTGTGACGAATTCATCAATGTGCCGGAATG GTCTTACATAGTGGAGAAGGCCAATCCAGTCAATGACCTCTGTTACCCAGGGGATTTCAATGACTATGAAGAATTGAAACACCTATTGAGCAGAATAAACCATTTTGGAAAAATTCAG ATCATCCCCAAAAGTTCTTGGTCCAGTCATGAAGCCTCATTGGGGGTGAGCTCAGCATGTCCATAACCAGGAAAGTCTCCTTTTTCAGAAATGTGGTATGGCTTATCAAAAAGAACA GTACATACCCAACAATAAAGAGGAGCTACAATAATACCAACCAAGAAGATCTTTTGGTACTGTGGGGGATTACCATCTAATGATGCGGCAGAGCAGACAAAGCTCTATCAAACC CAACCACCTATATTTCCGTTGGGACATCTACACTAAACCAGAGATTGGTACCAAGAATAGCTACTAGATCCAAAGTAAACCGGCAAAGTGAAGGATGGAGTTCTTCTGGACAATTTT AAAACCGAATGATGCAATCAACTTCGAGAGTAATGGAAATTTCAATTGCTCCAGAATATGCATACAAAATTGTCAAGAAAGGGGACTCAACAATTATGAAAAGTGAATTGGAATATGG TAACTGCAACACCAAGTGTCAAACCTCAATGGGGCGATAAATCTAGCATGCCATTCACAATATACACCCTCTACCATCGGGGAATGCCCAAATATGTGAAATCAAACAGATTA GTCCTTGGGACTGGGCTCAGAAATAGCCCTCAACGAGAGACGCGAGGATTATTTGGAGCTATAGCAGTTTTATAGAGGGAGGATGGCAGGGAATGGTAGATGGTTGGTATGGGTA CCACCATAGCAACGAGCAGGGGAGTGGGTACGCTGCAGACAAAGAATCACTCAAAGGCAATAGATGGAGTCAACCAATAAGGTCAACTCGATTATTGACAAAATGAACACTCAGT TTGAGGCCGTTGGAAGGGAAATTAACAACCTAGAAAAGGAGAATAGAGAATTTAAACAAGAAGTGAAGACGGGTTCTAGATGTCTGGACTTATAATGCTGAACTTCTAGTTCTCA TGGAAAACGAGAGAACTTAGACTTTTATGACTCAAATGTCAAGAACCTTTACGACAAGGTCCGACTACAGCTTAGGGATAATGCAAAGGAGCTGGGTAACCGTTGTTTCGAGTTCT ATCATAAATGTGATAATGAATGTATGGAAGTGTGAAGAACGGAACGTATGACTACCCGAGTATTCAGAAGAAGCAAGACTAAAAAGAGAGGAAATAAGTGGAGTAAAACCTCGAG TTAATTAA</p> |
| <p>A/Puerto-Rico/8/1934 H1 (codon optimized)</p>                      | <p><u>GCTAGCAGACACA</u>ATCTGCATTGGCTACCACGCCAAACAATAGCACTGACACCGTGGAATACTGTGCTGGAGAAGAAGCTGACAGTACTCACAGCGTGAACCTGCTGGAAGACTCCCA TAATGGGAAGCTGTGCAGGCTGAAAGGCATCGCCCTCTGCAGCTGGGAAAGTGCAACATTGCTGGATGGCTGCTGGGGAATCCTGAGTGTGATCCCCTGCTGCCTGTGAGATCTTG GAGTTACATCGTGGAGACCCCAAATCTGAAAATGGCATCTGCTACCCCGGAGACTTTATTGATTATGAGGAACTGCGGGAGCAGCTGAGCAGCGTGAAGCAGCTTCGAGAGGTTGGA AATTTTCCAAAAGAAAGCTCTGGCCCAACCACAATACCACAAAGGGCGTGACTGCCGTTGTTCCCATGCCGAAAATCTAGTTTCTACCGGAACCTGCTGTGGCTGACCGAGAAG GAAGGCTCTTACCCTAAGCTGAAAACAGTTACGTGAATAAGAAAGGGAAGGAGGTGCTGGTGTGTGGGGCATCCACATCCAAAGCAACTCAAAGATCAGCAGAATATCTACCA GAACGAAAATGCCTATGTGAGCGTGGTGACATCCAATACAATAGGAGGTTACCCTGAGATTGCTGAAAAGACCTAAGGTGCGCGACCAGGCTGGAAGAATGAACTACTATTGGA CTCTGCTGAAACCTGGGGATACCATCATTTTTCGAGGCCAACGGCAATCTGATTGCTCCACGGTATGCCTTTGCTGTCTCGCGGGTTGGCAGTGGAAATCATTACATCTAACGCCAGT ATGACACGAGTGAATACCAAGTGTGACACACCCCTGGGCGCTATCAACAGCTCCCTGCCCTTCCAGAATATCCATCCTGTGACCATTGGAGAGTGGCCAAAATACGTGAGGAGCGCCA AGCTGAGAATGGTGACAGGGCTGAGGAACATCCCAGCATTCACTCCAGAGGCTGTTTGGAGCCATCGCTGGATTCAATGAGGGCGGATGGACAGGGATGATCGACGGGTGGTA CCGCTATCACCATCAGAACGAACAGGGGAGCGGCTATCCGCTGATCAGAAGTCCACCCAGAAGCCATCAATGCCATTACAAACAAGTGAATTCGGTATCGAGAAGATGAACAT TCAGTTTACTGCTGGGAAAGGAATTAATAAGCTGGAGAACCGGATGGAAAACCTGAATAAGAAAGTGAAGGAGCAGTATGGGTTTCTGGACATCTGGACTTACAACCGCAGCTGCTGG TGCTGCTGGAGAATGAACGCACCCCTGGACTTCCAGGATTCTAACGTGAAGAATCTGTATGAAAAGGTGAAAAGTCAAGTGAAGAACAATGCTAAAGAGATCGGAAACGGGTGTTTT</p>                                                                                                                         |



|                                                        |                                                                                                                                                                                                                                                                                                                                                                                                                                                                                                                                                                                                                                                                                                                                                                                                                                                                                                                                                                                                                                                                                                                                                                                                                                                                                                                                                                                                                                                                                                                                                                                                                                         |
|--------------------------------------------------------|-----------------------------------------------------------------------------------------------------------------------------------------------------------------------------------------------------------------------------------------------------------------------------------------------------------------------------------------------------------------------------------------------------------------------------------------------------------------------------------------------------------------------------------------------------------------------------------------------------------------------------------------------------------------------------------------------------------------------------------------------------------------------------------------------------------------------------------------------------------------------------------------------------------------------------------------------------------------------------------------------------------------------------------------------------------------------------------------------------------------------------------------------------------------------------------------------------------------------------------------------------------------------------------------------------------------------------------------------------------------------------------------------------------------------------------------------------------------------------------------------------------------------------------------------------------------------------------------------------------------------------------------|
|                                                        | GAGTTCTACCATAAGTGGCACAACGAGTGTATGGAATCCGTGAGGAAATGGCACCTACGATTATCCTAAATATTCTGAAGAGAGTAAGCTGAATAGAGAGAAAGTGGATGGAGTGAA<br>GCTCGAGTTAATTA                                                                                                                                                                                                                                                                                                                                                                                                                                                                                                                                                                                                                                                                                                                                                                                                                                                                                                                                                                                                                                                                                                                                                                                                                                                                                                                                                                                                                                                                                                 |
| A/Hong-Kong/1/1968<br>H3 (codon optimized)             | <u>GCTAGCACAGGACCTGCCCGCAACGATAAATCCACCGCCACCTGTGCCTGGGACACCACGAGTGCCTAATGGCACCTGGTGAAGACCATCACAGACGATCAGATCGAGGTGAC</u><br>CAACGCCACAGAGCTGGTGCAGAGCTCCTCTACCGCAAGATCTGCAACAATCCTCACGGATCCTGGACGGCATCGATTGTACTGATCGACGCACTGCTGGGCGACCCACACTG<br>CGACGTGTTCCAGAATGAGACCTGGGATCTGTTCTGGAGAGGTCCAAGGCTTTTCTAACTGTTACCCCTATGACGTGCCTGATTACGCCTCTCTGCGCAGCCTGGTGGCCAGCTCC<br>GGCACCTGGAGTTCATCACAGAGGGCTTACCTGGACAGGCTGACCCAGAATGGAGGATCCAACGCATGCAAGAGGGGACCAGGAAGCGGCTCTTTTCCAGACTGAACTGGCT<br>GACCAAGAGCGGCTCCACATACCCCGTGCTGAATGTGACCATGCCTAAACAAGCAACTTCGATAAGCTGTACATCTGGGGCGTGACCACCTTCTACCAATCAGGAGCAGACATCC<br>CTGTACGTGCAGGCTCTGGAAGGGTGACCGTGTCTACACGGAGAAGCCAGCAGACCATCATCCCTAACATCGGCTCCCGGCCATGGGTGAGAGGCATGTCTAGCAGAATCTCTATC<br>TATTGGACAATCGTGAAGCCTGGCGACGTGCTGGTCACTCACTAATGGCAACCTGATCGCCCCAAGGGGCTACTTCAAGATGCGCACCCGCAAGTCTCTATCATGAGGAGCGAC<br>GCCCAATCGATACCTGCATCAGCGAGTGTATCACACCAATGGCTCCATCCAAACGATAAAGCCCTTTCAGAATGTGAACAAGATCACCTACGGCGCCTGTCCAAAGTATGTGAAGC<br>AGAATACCTGAAGCTGGCCACAGGCATGAGGAACGTGCCGAGAAGCAGACACGCGGCTGTTTCGGAGCAATCGCAGGCTTTATCGAGAATGGCTGGGAGGGCATGATCGACGG<br>CTGGTATGGCTCCGCCACCAGAACTCTGAGGGAACCGGACAGGCAGACACTGAAGAGCACACAGGCAGCCATCGATCAGATCAATGGCAAGCTGAACAGAGTGTGAGAAAG<br>ACCAATGAGAAGTCCACCAGATCGAGAAGGAGTTTTCCGAGGTGGAGGGCAGAATCCAGGATCTGGAGAAGTACGTGGAGGACACAAAGATCGATCTGTGGAGCTATAATGCCG<br>AGCTGCTGGTGGCCCTGGAGAACCAGCACACCATCGACCTGACAGATTCGAGATGAACAAGCTGTTTCGAGAAGACCAGGCGCCAGCTGAGGGAGAATGCCGAGGACATGGGCAA<br>CGGCTGCTTAAAGATCTACCACAAGTGCATAATGCCTGTATCGAGAGCATCCGCAACGGCACATACGACCACGACGTGACCGGGACGAGGCCCTGAACAATAGATTTTCAGATCAA<br>GGGCGTGGAGCTGAAGCTCGAGTTAATTA    |
| A/Netherlands/109/<br>2003 H3 (not codon<br>optimized) | <u>GCTAGCACAAAAGCTTCCCGAAATGACAACAGCACGGCAACGCTGTGCCTTGGGCACCATGCAGTACCAAACGGAACGATAGTGAAAACAATCACGAATGACCAAATGAAGTTAC</u><br>TAATGCTACTGAGCTGGTTCAGAGTTCCTCAACAGGTGGAATATGCAACAGTCTCATCAGATCCTTGATGGAGAAAAGTGCACACTAATAGATGCTCTATTGGGAGACCCTCAGTGT<br>GATGGATTCCAAAATAAGAAATGGGACCTTTTTGTTGAACGACGAAAAGCCTACAGCAACTGTTACCCCTATGATGTGCCGATTATGCCTCCCTTAGTCTACTAGTTGCCTCATCCGG<br>CACACTGGAGTTAAACAATGAAAGCTTCAATTGGACTGGAGTCACTCAGAATGGAACAAGCTCTGCTTGCAAAGGAGATCTAATAAAAGTTTCTTTAGTAGATTGAATTGGTTGACC<br>CACTTAAAATACAAATACCCAGCATTGAACGTGACTATGCCAAACAATGAAAATTTGACAAATTTGTACATTTGGGGGTTACCACCCGGGTACGGACAGTGACCAATCAGCCTAT<br>ATGCTCAAGCATCAGGAAGAATCACAGTCTTACCAAAGAAGCCAACAACCTGTAATCCCGAATATCGGATCTAGACCCAGGGTAAGGGATATCTCCAGCAGAATAAGCATCTATT<br>GGACAATAGTAAAACCGGGAGACATACTTTTGATTAACAGCACAGGGAATCTAATTGCTCCTCGGGTTACTTCAAATACGAAGTGGGAAAAGCTCAATAATGAGATCAGATGCAC<br>CCATTGGCAAATGCAATTCTGAATGCATCACTCCAAATGGAAGCATTCCAATGACAAACCTTTCAAATGTAACAGGATCACATATGGGGCCTGTCCAGATATGTTAAGCAAAA<br>CACTCTGAAAATGGCAACAGGGATGCGAAAATGTACCAGAGAAAACAACCTAGAGGCATATTTGGCGCAATCGCGGGTTTCATAGAAAATGTTGGGAGGGAAATGGTGACGGTTGGT<br>ACGGTTTCAGGCATCAAAAATCTGAGGGCACAGGACAAGCAGCAGATCTCAAAGCACTCAAGCAGCAATCAACCAAATCAATGGGAAAATGAATAGGTTAATCGGGAAAACAAC<br>GAGAAAATCCATCAGATTGAAAAGAAATCTCAGAAGTAGAAGGGAGAATTCAGGACCTCGAGAAAATGTTGAGGACACTAAAATAGATCTCTGGTCATACAACGCGGAGCTTCTT<br>GTTGCCCTGGAGAACCAACATAACAATTGATCTAACTGACTCAGAAATGAACAACTGTTTGAAGAACAAGAAGCAACTGAGGGAAAATGCTGAGGATATGGGCAATGGTTGTTTC<br>AAAATATACCACAAATGTGACAATGCCTGCATAGAGTCAATCAGAAATGGAACCTATGACCATGATGTATACAGAGATGAAGCATTAAACAACCGGTTCCAGATCAAAGGTGTTGAG<br>CTGAAGTTAATTA |
| A/Netherlands/761/<br>2009 H3 (not codon<br>optimized) | <u>GCTAGCACAAAACCTTCTGGAATGACAACAGCACGGCAACGCTGTGCCTTGGGCACCATGCAGTACCAAACGGAACGATAGTGAAAACAATAACGAATGACCAAATGAAGTTAC</u><br>TAATGCTACTGAGCTGGTTCAGAGTTCCTCAACAGGTGAAATATGGCAGAGTCTCATCAGATCCTTGATGGAGAAAAGTGCACACTAATAGATGCTCTATTGGGAGACCCTCAGTGT<br>GATGGCTTCCAAAATAAGAAATGGGACCTTTTTGTTGAACGACGAAAAGCCTACAGCAACTGTTACCCCTATGATGTGCCGATTATGCCTCCCTTAGTCTACTAATGCTCATCCGG<br>CACACTGGAGTTAAACAATGAAAGCTTCAATTGGACTGGAGTCACTCAAAATGGAACAAGCTCTGCTTGCAATAAGGAGATCTAATAACAGTTTCTTTAGTAGATTAAAATGGTTGACCC<br>ACTTAAGATTCAAGTACCCAGCATTGAACGTGACTATGCCAAACAATGAACAATTTGACAAATTTGTACATTTGGGGGTTACCACCCGGGTACGGACAATGACCAAATCTTCTGTGTA<br>TGCTCAAGCATCAGGAAGAATCACAGTCTTACCAAAGAAGCCAACAACCTGTAATCCCGAATATCGGATCTAGACCCAGAGTAAAGGAATATCCCTAGCAGAATAAGCATCTATTGG<br>ACAATAGTAAAACCGGGAGACATACTTTTGATTAACAGCACAGGGAATCTAATTGCTCCTAGGGTTACTTCAAATACGAAGTGGGAAAAGCTCAATAATGAGATCAGATGCACCC<br>ATTGCAAATGCAATTCTGAATGCATCACACCAATGGAAGCATTCCAATGACAAACCTTCAAATGTAACAGGATCACATACGCGGCTGTCCAGATATGTTAAGCAAAA<br>CTCTGAAAATGGCAACAGGGATGCGAAAATGTACCAGAGAAAACAACCTAGAGGCATATTTGGCGCAATCGCGGGTTTCATAGAAAATGTTGGGAGGGAAATGGTGAGGTTGGTGTGAC<br>GGTTTCAGGCATCAAAAATCTGAGGGAAGAGGACAAGCAGCAGATCTCAAAGCACTCAAGCAGCAATCGATCAAATCAATGGGAAGCTGAATAGATTGATCGGAAAACAACGAA                                                                                                                                                                                                                                                                                                                                                                                        |

|                                                                                    |                                                                                                                                                                                                                                                                                                                                                                                                                                                                                                                                                                                                                                                                                                                                                                                                                                                                                                                                                                                                                                                                                                                                                                                                                                                                                                                                                                                                                                                                                                                                                                                                                                                                      |
|------------------------------------------------------------------------------------|----------------------------------------------------------------------------------------------------------------------------------------------------------------------------------------------------------------------------------------------------------------------------------------------------------------------------------------------------------------------------------------------------------------------------------------------------------------------------------------------------------------------------------------------------------------------------------------------------------------------------------------------------------------------------------------------------------------------------------------------------------------------------------------------------------------------------------------------------------------------------------------------------------------------------------------------------------------------------------------------------------------------------------------------------------------------------------------------------------------------------------------------------------------------------------------------------------------------------------------------------------------------------------------------------------------------------------------------------------------------------------------------------------------------------------------------------------------------------------------------------------------------------------------------------------------------------------------------------------------------------------------------------------------------|
|                                                                                    | <p>GAAATTCATCAGATTGAAAAAGAATTCTCAGAAGTCGAAGGGAGAATTCAGGACCTTGAGAAATATGTTGAGGACACCAAAATAGATCTCTGGTCATACAACGCGGAGCTTCTGT<br/> TGCCCTGGGAAACCAACATACAATTGATCTAAGTACTGACTCAGAAATGAACAACTGTTTAAAAAACAAGAAGCAACTGAGGGAAAATGCTGAGGATATGGGCAATGGTTGTTCAA<br/> AATATACCACAAATGTGACAATGCCTGCATAGGATCAATCAGGAATGGAACCTTATGACCACGATGTATACAGAGATGAAGCATTAAACAACCGGTTCCAGATCAAGGGAGTTGAGCT<br/> GAAGTTAATTA</p>                                                                                                                                                                                                                                                                                                                                                                                                                                                                                                                                                                                                                                                                                                                                                                                                                                                                                                                                                                                                                                                                                                                                                                                                                                                                    |
| <p>A/Hong-<br/>Kong/480/2014 H3<br/>(3C.2a) (codon<br/>optimized)</p>              | <p><u>GCTAGCTCAAAAAATTCCTGGAATGACAATAGCACGGCAACGCTGTGCCTTGGGCACCATGCAAGTACCAACGGAACGATAGTAAAAACAATCACGAATGACCGAATTGAAGTTAC</u><br/> TAATGCTACTGAGCTGGTTCAGAATCCTCAATAGGTGAAATATGCGACAGTCCTCATCAGATCCTTGATGGAGAAAACGACACTAATAGATGCTCTATTGGGAGACCCCTCAGTGT<br/> GATGGCTTTCAAATAAGAAATGGGACCTTTTTGTTGAACGAAGCAAAGCCTACAGCAACTGTTACCTTATGATGTGCCGATTATGCCTCCCTTAGGTCAGTTCCTCATCCGG<br/> CACACTGGAGTTTAAACAATGAAAGCTTCAATTGGACTGGAGTCACTAAAACGGAACAAGTTCTGCTTGCATAAGGAGATCTAGTAGTGTCTTTTAGTAGATTAATTTGGTTGACC<br/> CACTTAACTACACATACCCAGCATTGAACGTGACTATGCCAAACAATGAACAATTTGACAAATGTACATTTGGGGGGTTCACCACCCGGTACGGACAAGGACCAAAATCTTCTGT<br/> ATGCTCAATCATCAGGAAGAATCACAGTATCTACAAAAGAAGCCAAACAGCTGTAATCCAAATATCGGATCTAGACCCAGAATAAGGGATATCCCTAGCAGAATAAGCATCTATTG<br/> GACAATAGTAAAACCGGGAGACATACTTTTGATTAACAGCACAGGGAATCTAATTGCTCCTAGGGGTTACTTCAAATACGAAGTGGGAAAAGCTCAATAATGAGATCAGATGCACC<br/> CATTGGCAAATGCAAGTCTGAATGCATCACTCCAATGGAAGCATTCCAATGACAAACCATTCCAAATGTAACAGGATCACATACGGGGCCTGTCCAGATATGTTAAGCATAGC<br/> ACTCTGAAATGGCAACAGGAATGCGAAATGTACCAGAGAAAACAAGTACAGGACATATTTGGCGCAATAGCGGTTTCATAGAAAATGGTTGGGAGGGAATGGTGGATGGTTGGTA<br/> CGGTTTCAGGCATCAAAATTCGAGGGAAGAGGACAAGCAGCAGATCTCAAAGCACTCAAGCAGCAATCGATCAAATCAATGGGAAGCTGAATCGATTGATCGGGAAAACCAACG<br/> AGAAATTCATCAGATTGAAAAAGAATTCTCAGAAGTAGAAGGAAGAATTCAGGACCTTGAGAAATATGTTGAGGACACTAAAATAGATCTCTGGTCATACAACGCGGAGCTTCTTG<br/> TTGCCCTGGGAAACCAACATACAATTGATCTAAGTACTGACTCAGAAATGAACAACTGTTTAAAAAACAAGAAGCAACTGAGGGAAAATGCTGAGGATATGGGCAATGGTTGTTCAA<br/> AAATATACCACAAATGTGACAATGCCTGCATAGGATCAATAAGAAATGGAACCTTATGACCACAATGTGTACAGGGATGAAGCATTAAACAACCGGTTCCAGATCAAGGGAGTTGAGC<br/> TGAAGTTAATTA</p> |
| <p>A/Netherlands/354/<br/>2016 H3 (not codon<br/>optimized)</p>                    | <p><u>GCTAGCACAAAAATTCCTGGAATGACAATAGCACGGCAACGCTGTGCCTTGGGCACCATGCAAGTACCAACGGAACGATAGTAAAAACAATCACAAATGACCGAATTGAAGTTAC</u><br/> TAATGCTACTGAGCTGGTTCAGAATCCTCAATAGGTGAAATATGCGACAGTCCTCATCAGATCCTTGATGGAGAAAACGACACTAATAGATGCTCTATTGGGAGACCCCTCAGTGT<br/> GATGGCTTTCAAATAAGAAATGGGACCTTTTTGTTGAACGAAGCAAAGCCTACAGCAACTGTTACCTTATGATGTGCCGATTATGCCTCCCTTAGGTCAGTTCCTCATCCGG<br/> CACACTGGAGTTTAAACAATGAAAGCTTCAATTGGACTGGAGTCACTAAAACGGAACAAGTTCTGCTTGCATAAGGAAATCTAGTAGTGTCTTTTAGTAGATTAATTTGGTTGACC<br/> ACTTAAATACACATACCCAGCATTGAACGTGACTGTGCCAAACAATGAACAATTTGACAAATGTACATTTNGGGGGTTCACCACCCGGTACGGACAAGGACCAAAATCTTCTGTA<br/> TGCTCGATCATCAGGAAGAATCACAGTATCTACAAAAGAAGCCAAACAGCTGTAATCCAAATATCGGATCTAGACCCAGAATAAGGGATATCCCTAGCAGAATAAGCATCTATTGG<br/> ACAATAGTAAAACCGGGAGACATACTTTTGATTAACAGCACAGGGAATCTAATTGCTCCTAGGGGTTACTTCAAATACGAAGTGGGAAAAGCTCAATAATGAGATCAGATGCACC<br/> ATTGGCAAATGCAAGTCTGAATGCATCACTCCAATGGAAGCATTCCAATGACAAACCATTCCAAATGTAACAGGATCACATACGGGGCCTGTCCAGATATGTTAAGCATAGCA<br/> CTCTGAAATGGCAACAGGAATGCGAAATGTACCAGAGAAAACAAGTACAGGACATATTTGGCGCAATAGCGGGTTTCATAGAAAATGGTTGGGAGGGAATGGTGGATGGTTGGTAC<br/> GGTTTCAGGCATCAAAATTCGAGGGAAGAGGACAAGCAGCAGATCTCAAAGCACTCAAGCAGCAATCGATCAAATCAATGGGAAGCTGAATCGATTGATCGGGAAAACCAACGA<br/> GAAATTCATCAGATTGAAAAAGAATTCTCAGAAGTAGAAGGAAGAATTCAGGACCTTGAGAAATATGTTGAGGACACTAAAATAGATCTCTGGTCATACAACGCGGAGCTTCTGT<br/> TGCCCTGGGAAATCAACATACAATTGATCTAAGTACTGACTCAGAAATGAACAACTGTTTAAAAAACAAGAAGCAACTGAGGGAAAATGCTGAGGATATGGGAAATGGTTGTTCAA<br/> AATATACCACAAATGTGACAATGACTGCATAGGATCAATAAGAAATGGAACCTTATGACCACAATGTGTACAGGGATGAAGCATTAAACAACCGGTTCCAGATCAAGGGAGTTGAGCT<br/> GAAGTTAATTA</p>     |
| <p>A/Singapore/INFH-<br/>16-0019/2016 H3<br/>(3C.2a) (not codon<br/>optimized)</p> | <p><u>GCTAGCACAAAAATTCCTGGAATGACAATAGCACGGCAACGCTGTGCCTTGGGCACCATGCAAGTACCAACGGAACGATAGTAAAAACAATCACAAATGACCGAATTGAAGTTAC</u><br/> TAATGCTACTGAGTTGGTTCAGAATCCTCAATAGGTGAAATATGCGACAGTCCTCATCAGATCCTTGATGGAGAGAAGTGCACACTAATAGATGCTCTATTGGGAGACCCCTCAGTGT<br/> GATGGCTTTCAAATAAGAAATGGGACCTTTTTGTTGAACGAAGCAAAGCCTACAGCAACTGTTACCTTATGATGTGCCGATTATGCCTCCCTTAGGTCAGTTCCTCATCCGG<br/> CACACTGGAGTTTAAAAATGAAAGCTTCAATTGGACTGGAGTCACTAAAACGGAACAAGTTCTGCTTGCATAAGGGGATCTAGTAGTGTCTTTTAGTAGATTAATTTGGTTGACC<br/> CACTTAACTACACATATCCAGCATTGAACGTGACTATGCCAAACAAGGAACAATTTGACAAATGTACATTTGGGGGGTTCACCACCCGGTACGGACAAGGACCAAAATCTTCTGT<br/> ATGCTCAATCATCAGGAAGAATCACAGTATCTACAAAAGAAGCCAAACAGCTGTAATCCAAATATCGGATCTAGACCCAGAATAAGGGATATCCCTAGCAGAATAAGCATCTATTG<br/> GACAATAGTAAAACCGGGAGACATACTTTTGATTAACAGCACAGGGAATCTAATTGCTCCTAGGGGTTACTTCAAATACGAAGTGGGAAAAGCTCAATAATGAGATCAGATGCACC<br/> CATTGGCAAATGCAAGTCTGAATGCATCACTCCAATGGAAGCATTCCAATGACAAACCATTCCAAATGTAACAGGATCACATACGGGGCCTGTCCAGATATGTTAAGCATAGC</p>                                                                                                                                                                                                                                                                                                                                                                                                                                                                                                                                                                                                                                                     |

|                                                               |                                                                                                                                                                                                                                                                                                                                                                                                                                                                                                                                                                                                                                                                                                                                                                                                                                                                                                                                                                                                                                                                                                                                                                                                                                                                                                                                                                                                                                                                                                                                                                                       |
|---------------------------------------------------------------|---------------------------------------------------------------------------------------------------------------------------------------------------------------------------------------------------------------------------------------------------------------------------------------------------------------------------------------------------------------------------------------------------------------------------------------------------------------------------------------------------------------------------------------------------------------------------------------------------------------------------------------------------------------------------------------------------------------------------------------------------------------------------------------------------------------------------------------------------------------------------------------------------------------------------------------------------------------------------------------------------------------------------------------------------------------------------------------------------------------------------------------------------------------------------------------------------------------------------------------------------------------------------------------------------------------------------------------------------------------------------------------------------------------------------------------------------------------------------------------------------------------------------------------------------------------------------------------|
|                                                               | <p>ACTCTGAAATTGGCAACAGGAATGCGAAATGTACCAGAGAAAACAACTAGAGGCATATTTGGCGCAATAGCGGGTTTCATAGAAAATGGTTGGGAGGGAATGGTGGATGGTTGGTACGTTTCAGGCATCAAAATTCTGAGGGAAGAGGACAAGCAGCAGATCTCAAAAGCACTCAAGCAGCAATCGATCAAATCAATGGGAAGCTGAATAGTTGATCGGAAAAACCAACGAGAAAATCCATCAGATTGAAAAAGAATTCTCAGAAGTAGAAGGAAGAGTTCAAGACCTTGAGAAATATGTTGAGGACACTAAAATAGATCTCTGGTCATAACCGGAGCTTCTTGTTGCCCTGGAGAACCAACATACAATTGATCTAACTGACTCAGAAAATGAACAACTGTTTGAAAAAACAAAGAAGCAACTGAGGGAAAAATGCTGAGGATATGGGAAATGGTTGTTTCAAAATATACCACAAATGTGACAATGCCTGCATAGAATCAATAAGAAATGAAACTTATGACCACAATGTGTACAGGGATGAAGCATTGAACAACCGGTTCCAGATCAAGGGAGTTGAGCTGAAGTTAATTAA</p>                                                                                                                                                                                                                                                                                                                                                                                                                                                                                                                                                                                                                                                                                                                                                                                                                                                                                                                                                               |
| <p>A/Kansas/14/2017 H3 (3C.3a) (codon optimized)</p>          | <p><u>GCTAGCTCAGAAGCTGCCTGGCAACGACAATTCTACCGCCACCCTGTGCCTGGGACACCACGCAGTGCCAAATGGCACCATCGTGAAGACCATCACAAACGATAGAATCGAGGTGACCAATGCCACAGAGCTGGTGAGAACAGCTCCATCGGCGAGATCTGCGACAGCCCACACCAGATCCTGGATGGCGAGAAGTGTACACTGATCGACGCACTGCTGGGCGACCCACAGTGGCATGGCTCCAGAATAAGAAGTGGGATCTGTTTGGGAGAGATCTAAGGCTACAGCAACTGTTACCCCTATGACGTGCCTGATTATGCCTCCCTGAGGTCTCTGGTGGCCTCTAGCGGCACCCTGGAGTTCAACAATGAGAGCTTTAATTGGGCCGGCTGACCCAGAACGGCACATCTAGCTGCATCCGCGGCAGCAAAATCCTTTCTTTCCCGGCTGAAGTGGCTACTCACCTGAATTCGAAGTACCCTGCCTGAACGTGACAATGCCAAACAATGAGCAGTTCGACAAGCTGTATATCTGGGGCGTGCACCACCCTGGCACAGACAAGGATCAGATCTCTCTGTACGCACAGAGCTCCGGAAGGATCACCGTCCACAAAGCGGTCTCAGCAGGCCGTGATCCCTAACATCGGCTCCCGGCCAAGAATCAGGGACATCCCCAGCCGATCTCCATCTATTGGACCATCGTGAAGCCAGGCATATCCTGCTGATCAACTCTACAGGCAATCTGATCGCCCCAGAGGCTACTCAAGATCAGGTCTGGCAAGTCTAGCATCATGCGGAGCGACGCCATCGGCAAGTGCAGTCCGAGTGTATCACCCCTAACGGCTCTATCCAAATGATAAGCCCTTTCAGAAGTGAATAGAATCACATACGGCGCCTGTCCAGATATGTGAAGCATGCCACCCTGAAGCTGGCCACAGGCATGAGGAACGTGCCTGAGAGGCAGACCAGGGGAATCTCGGAGCAATCGCCGGCTTTATCGAGAATGGCTGGGAGGGCATGGTGGACGGCTGGTATGGCTTCAGACACCAGAACAGCGAGGGAAGGGGACAGGCAGCAGACCTGAAGTCCACCAGGCCGCCATCGATCAGATCAACGGCAAGTGAATCGCTGATCGGCAAGACAAATGAGAAGTTCACCAGATCGAGAAGGAGTTTTCCGAGGTGGAGGGCCGGATCCAGGATCTGGAGAAGTACGTGGAGGACACCAAGATCGATCTGTGGTCTTATAATGCCGAGCTGCTGGTGGCCCTGGAGAACCAGCACACCATCGACCTGACAGATAGCGAGATGAACAAGCTGTTGAGAAGACCAAGAAGCAGCTGAGAGAGAACGCCGAGGACATGGGCAATGCTGCTTTAAGATCTACCACAAGTGCGATAATGCCTGTATCGGCAGCATCAGGAACGGCACATACGACCACGACGTGTACCCGACGAGGGCCCTGAACAATCGGTTTCAGATCAAGGCGGTGGAGCTGAAGTTAATTAA</u></p>     |
| <p>A/Netherlands/00010 /2019 H3 (3C.2a) (codon optimized)</p> | <p><u>GCTAGCTCAGAAGATCCCTGGCAACGACAATTCACCGCCACCCTGTGCCTGGGACACCACGCAGTGCCAAACGGCACCATCGTGAAGACCATCACAAACGATAGAATCGAGGTGACCAATGCCACAGAGCTGGTGAGAACAGCTCCATCGGCGAGATCTGCAATTCTCCACACCAGATCCTGGACGGCGGCAACTGTACACTGATCGATGCACTGCTGGGCGACCCACAGTGCATGGATTCCAGAATAAGAAGTGGGACCTGTTTGGGAGCGGAGCAGAGCCTACTCCAAGTGTACCCCTATGACGTGCCTGATTATGCCTCTCTGAGGAGCCTGGTGGCCTTAGCGCACCCCTGGAGTTCAAGAACGAGAGCTTTAATTGGGCCGGCTGACACAGAATGGCAAGTCTCTGCCTGCATCAGAGGACGCTCCTTAGCTTCTTTCCAGGCTGAAGTGGCTGACCCACCTGAATTACACATATCCTGCCTGAACGTGACCATGCCAAATAAGGAGCAGTTCGACAAGCTGTACATCTGGGGCGTGCACCACCCTGGCACAGACAAGGATCAGATCTTTCTGTATGCCAGTCTCTGGCCGCATACCGTGTCTACAAAGCGGAGCCAGCAGGCCGTGATCCCTAACATCGGCTCTAGGCCAAGGATCAGGGACATCCCATCCAGGATCTCTATCTACTGGACCATCGTGAAGCCAGGCGATATCCTGCTGATCAACAGCACAGGCAATCTGATCGCCCCAGAGGCTATTTCAAGATCAGGTCCGGCAAGAGCTCCATCATGCGGTCTGACGCCCATCGGCAAGTGCAGAGCGAGTGTATCACCCCTAACGGCTCCATCCAAATGATAAGCCCTTTCAGAAGTGAATAGAATCACATACGGCGCCTGTCCAGATATGTGAAGCAGAGCACCCCTGAAGCTGGCCACAGGCATGCGCAATGTGCCTGAGAAGCAGACCAGGGGAATCTCGGAGCAATCGCAGGCTTTATCGAGAATGGCTGGGAGGGCATGGTGGACGGCTGGTACGGCTTCAGACACCAGAAGCTGAGGGAAGGGGACAGGCAGCAGACCTGAAGAGCACCCAGGCCCATCGATCAGATCAACGGCAAGTGAATCGCTGATCGGCAAGACAAACGAGAAGTTCACCAGATCGAGAAGGAGTTTAGCGAGGTGGAGGGAAGGGTGCAGGATCTGGAGAAGTACGTGGAGGACACCAAGATCGATCTGTGGTCTTATAATGCCGAGCTGCTGGTGGCCCTGGAGAACCAGCACACCATCGACCTGACAGATTCTGAGATGAATAAGCTGTTGAGAAGACCAAGAAGCAGCTGAGAGAGAACGCCGAGGACATGGGCAATGCTGCTTTAAGATCTACCACAAGTGCGATAACGCTGTATCGGCTCCATCAGGAACGAGACATACGACCACAACGTGTACCCGACGATGAGGCCCTGAACAATCGGTTTCAGATCAAGGCGGTGGAGCTGAAGTTAATTAA</u></p> |

## References

- Bouwman KM, Delpont M, Broszeit F, Berger R, Weerts E, Lucas MN, Delverdier M, Belkasmi S, Papanikolaou A, Boons GJ, *et al.* 2019. Guinea fowl coronavirus diversity has phenotypic consequences for glycan and tissue binding. *J Virol*, 93.
- Broszeit F, Tzarum N, Zhu X, Nemanichvili N, Eggink D, Leenders T, Li Z, Liu L, Wolfert MA, Papanikolaou A, *et al.* 2019. N-glycolylneuraminic acid as a receptor for influenza A viruses. *Cell Rep*, 27:3284-3294 e3286.
- Broszeit F, van Beek RJ, Unione L, Bestebroer TM, Chapla D, Yang JY, Moremen KW, Herfst S, Fouchier RAM, de Vries RP, *et al.* 2021. Glycan remodeled erythrocytes facilitate antigenic characterization of recent A/H3N2 influenza viruses. *Nat Commun*, 12:5449.
- Byrd-Leotis L, Jia N, Matsumoto Y, Lu D, Kawaoka Y, Steinhauer DA, Cummings RD. 2022. Sialylated and sulfated N-Glycans in MDCK and engineered MDCK cells for influenza virus studies. *Sci Rep*, 12:12757.
- Nemanichvili N, Tomris I, Turner HL, McBride R, Grant OC, van der Woude R, Aldosari MH, Pieters RJ, Woods RJ, Paulson JC, *et al.* 2019. Fluorescent trimeric hemagglutinins reveal multivalent receptor binding properties. *J Mol Biol*, 431:842-856.
- Peng W, de Vries RP, Grant OC, Thompson AJ, McBride R, Tsogtbaatar B, Lee PS, Razi N, Wilson IA, Woods RJ, *et al.* 2017. Recent H3N2 viruses have evolved specificity for extended, branched human-type receptors, conferring potential for increased avidity. *Cell Host Microbe*, 21:23-34.
- Shibuya N, Goldstein IJ, Broekaert WF, Nsimba-Lubaki M, Peeters B, Peumans WJ. 1987. The elderberry (*Sambucus nigra* L.) bark lectin recognizes the Neu5Ac(alpha 2-6)Gal/GalNAc sequence. *J Biol Chem*, 262:1596-1601.
- Spruit CM, Nemanichvili N, Okamatsu M, Takematsu H, Boons GJ, de Vries RP. 2021. N-glycolylneuraminic acid in animal models for human influenza A virus. *Viruses*, 13.
- Spruit CM, Zhu X, Tomris I, Rios-Carrasco M, Han AX, Broszeit F, van der Woude R, Bouwman KM, Luu MMT, Matsuno K, *et al.* 2022. N-glycolylneuraminic acid binding of avian and equine H7 influenza A viruses. *J Virol*, 96:e0212021.

Sweeney JG, Liang J, Antonopoulos A, Giovannone N, Kang S, Mondala TS, Head SR, King SL, Tani Y, Brackett D, *et al.* 2018. Loss of GCNT2/I-branched glycans enhances melanoma growth and survival. *Nat Commun*, 9:3368.
